# Supplementary material
Source: Springer Nature journal article supplement (https://www.springermedizin.de/resource/supplementary/12874_2013_935_MOESM1_ESM.pdf/9433202)

### Unadjusted for therapist effects

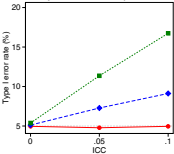

### Adjusted for therapist effects

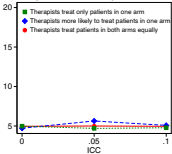

Supplement: MOESM1 [file 9433202]
